# Supplementary material for: Biochemical evidence of epicuticular wax compounds involved in cotton-whitefly interaction
Source: PubMed Central journal article supplement (PMC8096116; doi:10.1371/journal.pone.0250902), 2021-05-04
Supplement: pone.0250902.s002.pdf [file pone.0250902.s002.pdf]

| Biochemical Compounds                                                                                                            | <i>Gossypium</i> | GaWM3 | <i>Gossypium</i> | <i>Gossypium</i>  |
|----------------------------------------------------------------------------------------------------------------------------------|------------------|-------|------------------|-------------------|
|                                                                                                                                  | <i>arboretum</i> |       | <i>hirsutum</i>  | <i>harknessii</i> |
| 2-cyclopentene-1-ol, 1-phenyl-                                                                                                   | +                | -     | +                | -                 |
| Nonadecane                                                                                                                       | +                | +     | +                | -                 |
| 3-trifluoroacetoxytetradecane                                                                                                    | +                | -     | -                | -                 |
| Phenol, 2,5-bis [1,1- dimethyl]                                                                                                  | +                | +     | +                | -                 |
| Methoxyacetic acid, 2- tridecylester                                                                                             | +                | +     | -                | -                 |
| 2-piperidinone, n-[4-bromo-n-butyl]                                                                                              | +                | -     | -                | -                 |
| 4-heptafluorobutyroxypentadecane                                                                                                 | +                | -     | -                | -                 |
| Tetradecane, 2,6,10-trimethyl-                                                                                                   | +                | +     | +                | -                 |
| Silane, trichlorodocosyl-                                                                                                        | +                | -     | -                | -                 |
| 6-Octadecenoic acid, methyl ester                                                                                                | +                | -     | -                | -                 |
| Heptadecanoic acid, 16-methyl-, methyl ester                                                                                     | +                | -     | -                | -                 |
| 1,2-Benzenedicarboxylic acid, diisooctyl ester                                                                                   | +                | +     | +                | -                 |
| Caryophyllene                                                                                                                    | -                | +     | -                | +                 |
| $\alpha$ -Caryophyllene                                                                                                          | -                | +     | -                | +                 |
| Hexadecane                                                                                                                       | -                | +     | -                | -                 |
| Eicosane, 2-methyl-                                                                                                              | -                | +     | -                | -                 |
| Diethyl phthalate                                                                                                                | -                | +     | -                | -                 |
| 7,9-Di-tet-butyl-1-oxaspiro[4,5] deca – 6, 9-diene-2,8-dione                                                                     | -                | +     | -                | -                 |
| Ethanol, 2-[octadecyloxy]                                                                                                        | -                | +     | -                | -                 |
| A-D-Glucopyranoside, methyl-2-[acetylamino]-2-deoxy-3-O-[trimethylsilyl]-,cyclic methyl bronate                                  | -                | +     | -                | -                 |
| Octadecane, 1-[2-[hexadecyloxy]ethoxy]-                                                                                          | -                | +     | -                | -                 |
| 15,17,19,21- Hexatriacontatetrayne                                                                                               | -                | +     | -                | -                 |
| 5-[3-methoxymethoxy-10,13-dimethyl-2,3,4,9,10,11,13,14,15,16,17-dodecahydro-1Hcyclopenta[a][phenanthren-17-yl]-hex-1-ynul]-trime | -                | +     | -                | -                 |
| 2-Trifluoroacetoxysteradecane                                                                                                    | -                | -     | +                | -                 |
| Trichloroacetic acid, hexadecylester                                                                                             | -                | -     | +                | -                 |
| P-Xylenolphthalein                                                                                                               | -                | -     | +                | -                 |
| Lanceol, cis-                                                                                                                    | -                | -     | -                | +                 |
| Napthalene,1,2,3,4,4a,5,6,8a-octahydro-7-methyl-4-4methylene-1-[1-methylethyl],[1 $\alpha$ ,4a $\beta$ ,8a $\alpha$ ]-           | -                | -     | -                | +                 |
| 2,6,10-dodecatriene-1-ol,3,7,11-tromethyl-acetate,[E,E]- 2,6,10-dodecatriene-1-ol,3,7,11-tromethyl-acetate,[E,E]-                | -                | -     | -                | +                 |
| 2-napthalenemethanol,decahydro- $\alpha$ , $\alpha$ , 4a-trimethyl-8-methylene-, 2R-[2 $\alpha$ ,4a $\alpha$ ,8a $\beta$ ]-      | -                | -     | -                | +                 |
