# Supplementary material for: Biochemical evidence of epicuticular wax compounds involved in cotton-whitefly interaction
Source: PubMed Central journal article supplement (PMC8096116; doi:10.1371/journal.pone.0250902), 2021-05-04

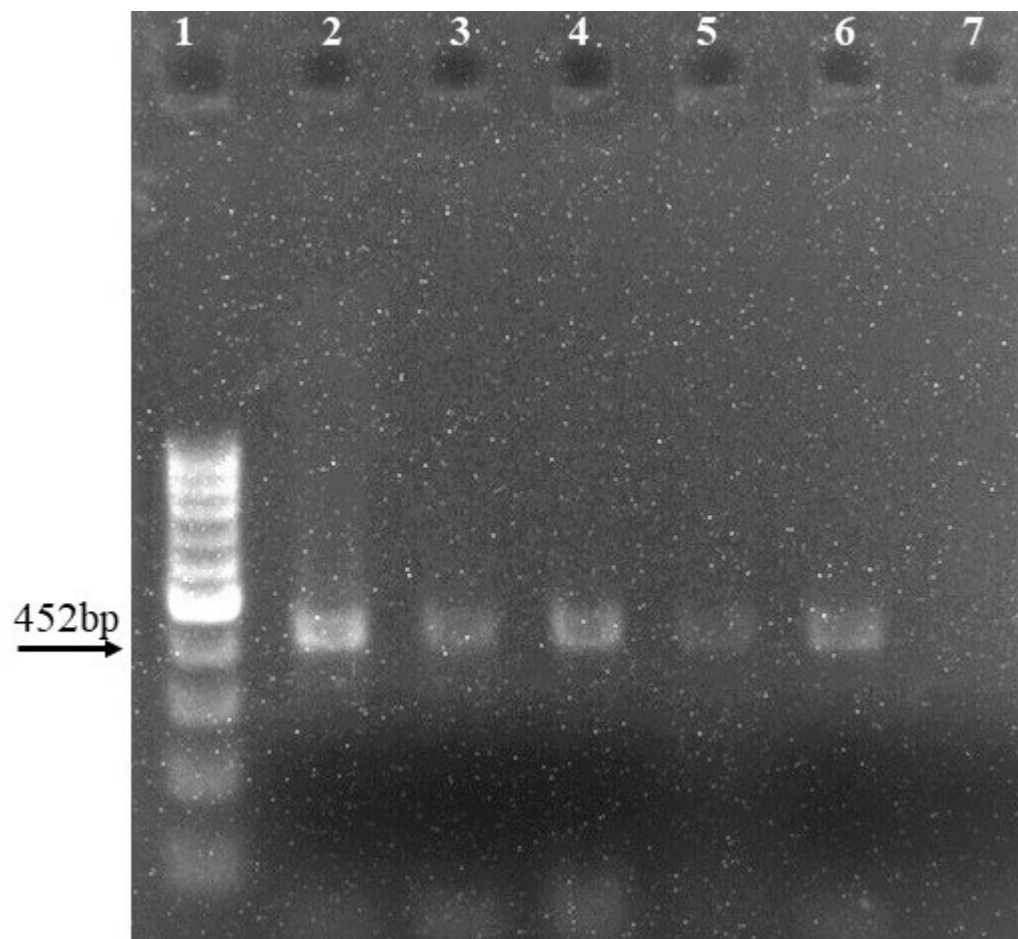

1 2 3 4 5 6 7 8 9 10 11 12 13

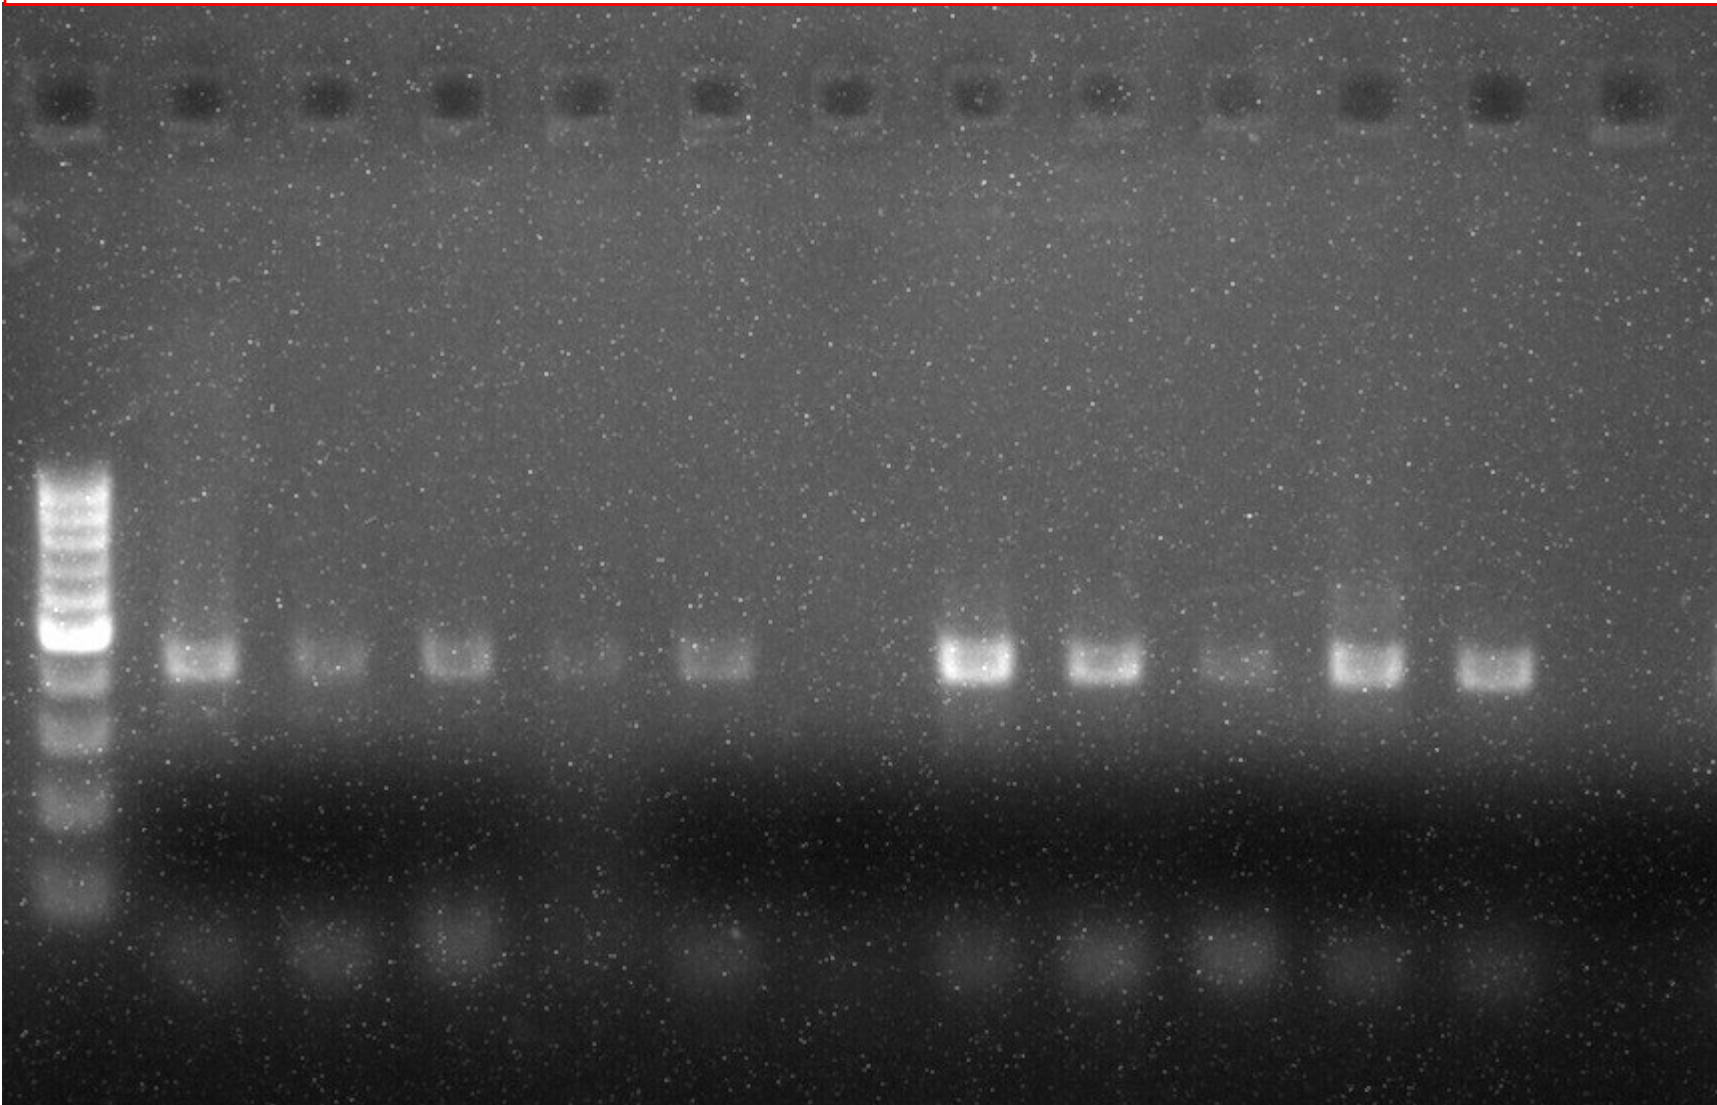

Supplement: pone.0250902.s003.pdf [file pone.0250902.s003.pdf]
